# Supplementary material for: Gut microbiome dysbiosis during COVID-19 is associated with increased risk for bacteremia and microbial translocation
Source: PubMed Central journal article supplement — bioRxiv. 2022 Mar 2:2021.07.15.452246. Preprint. [Version 2] doi: 10.1101/2021.07.15.452246 (PMC8902880; doi:10.1101/2021.07.15.452246), 2022-03-02
Supplement: NIHPP2021.07.15.452246v2-supplement-1.pdf [file NIHPP2021.07.15.452246v2-supplement-1.pdf]

## Supporting Information

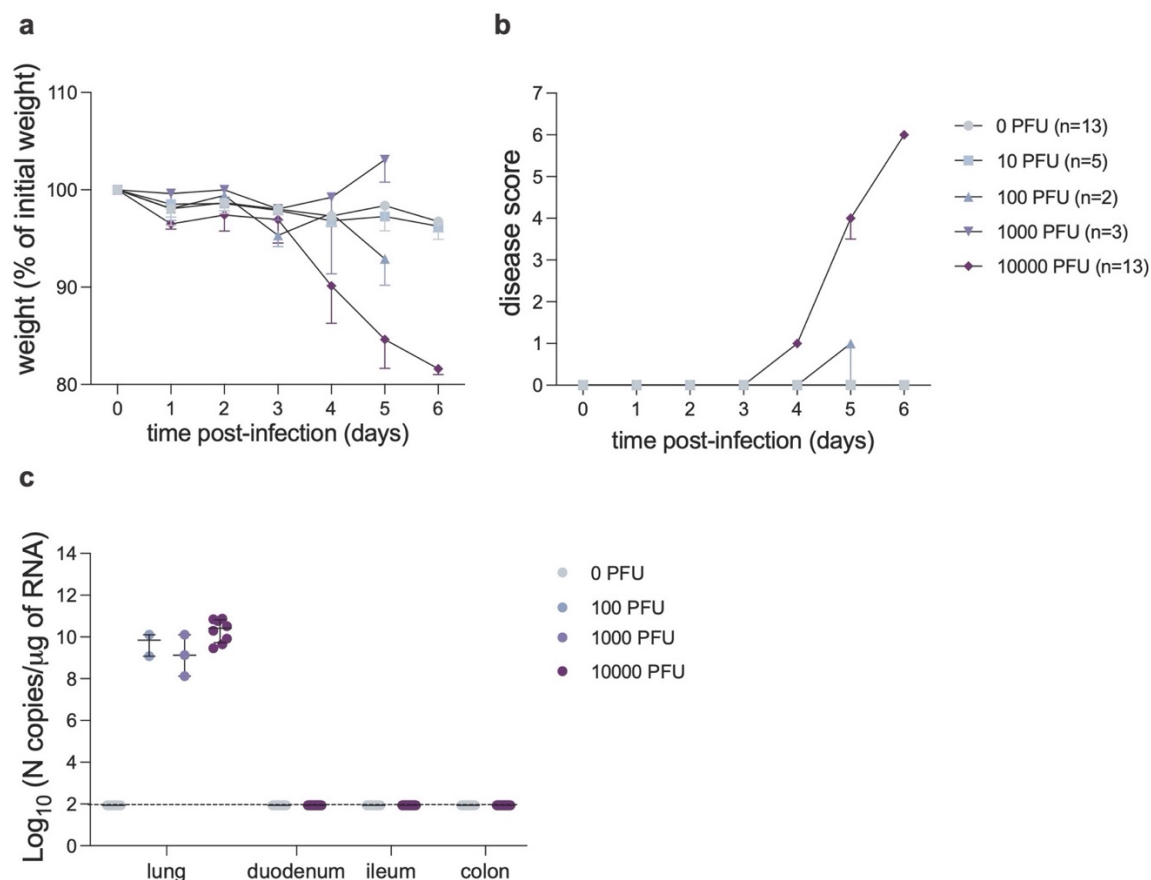

# **Extended Data Fig. S1 SARS-CoV-2 infection in K18-hACE2 mice.**

**a-b.** Following inoculation with 0, 10, 100, 1000 or 10000 PFU of SARS-CoV-2 or mock infection, mice were monitored daily for weight loss (a) and signs of disease quantified by a composite score based on ruffled fur, hunched back, heavy breathing and absence of mobility (b). Median and interquartile range determined for each group at each time point are depicted. Results are pooled from 1-3 independent experiments. For each group, the total number of mice is indicated. c. Viral burden in lung or intestinal tissue of K18-hACE2 mice was analyzed at 5-6 days after infection with 100, 1000, 10000 PFU of SARS-CoV-2 or mock infection by qRT-PCR. Dots represent the copy number of N RNA per μg of RNA calculated for each mouse. Results were pooled from 1 (100 and 1000 PFU doses) or 2 (mock and 10000 PFU) independent experiments with n=2-5 mice per group for each experiment. The median and interquartile range are depicted for each experimental group. The dotted line depicts the limit of detection.

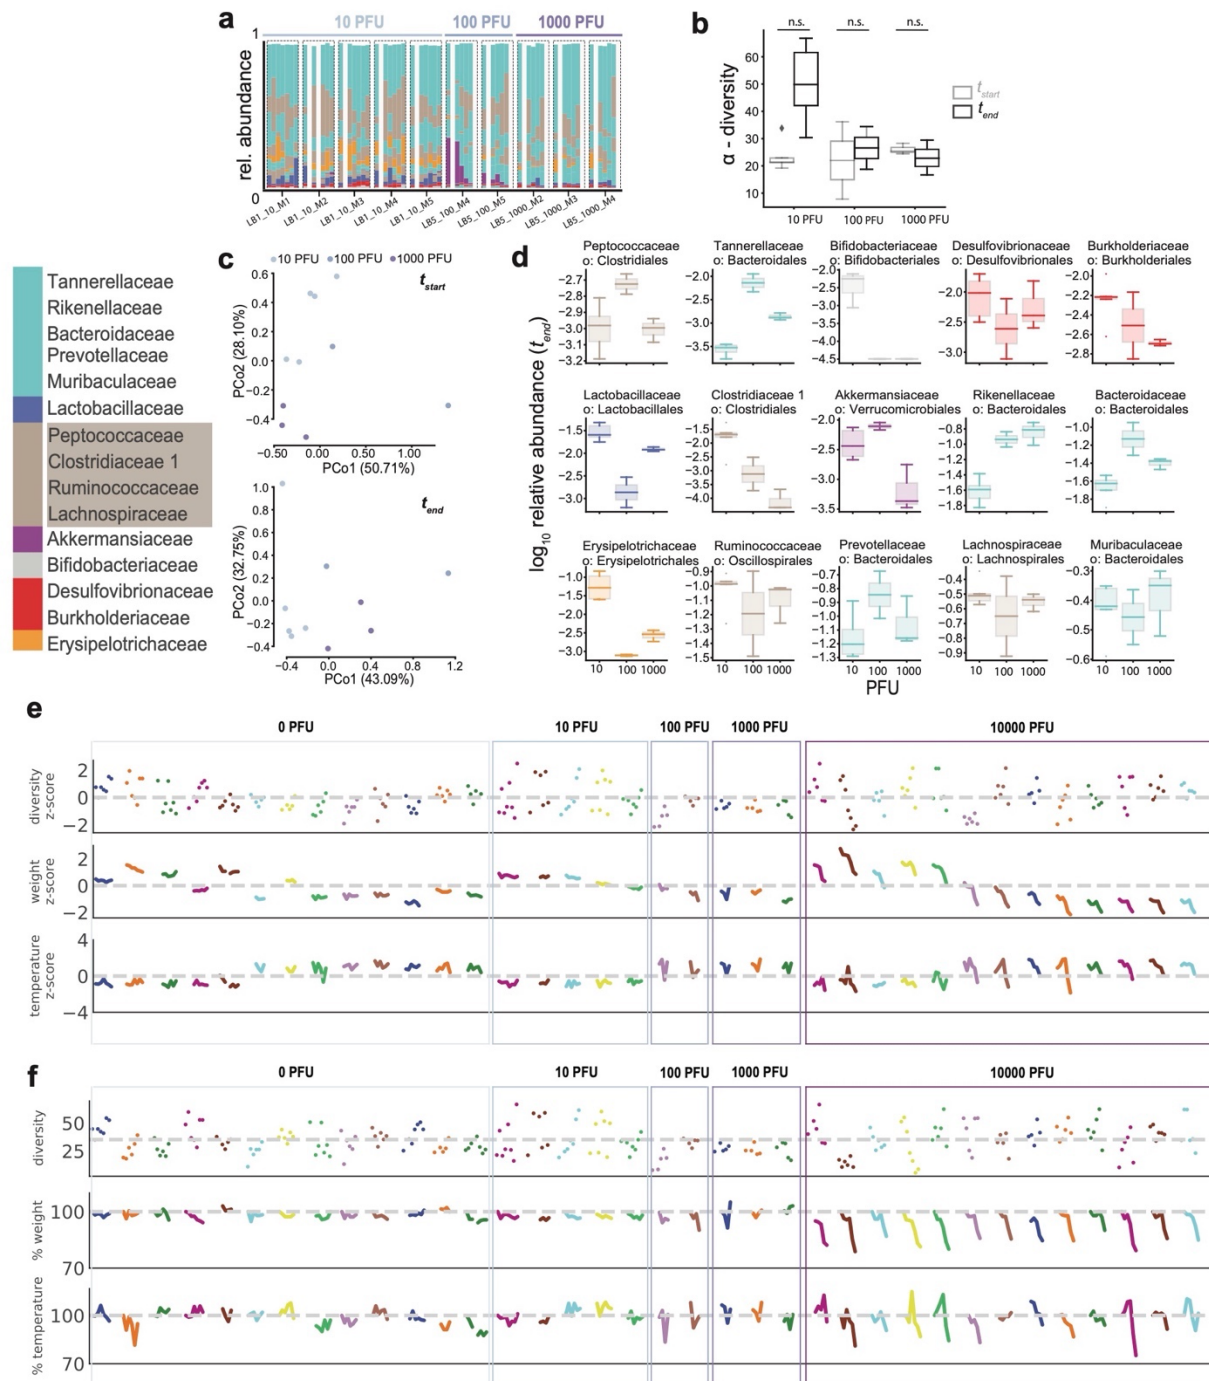

**Extended Data Fig. S2 Inconsistent microbiomes dynamics in mice with lower infection doses.** **a** Bars represent bacterial family compositions in stool samples collected from mice over time, mouse time courses grouped as indicated by boxes. **b** bacterial alpha diversity in first ( $t_{start}$ )

844 and last ( $t_{\text{end}}$ ) samples collected. **c** principal coordinate plots of bacterial compositions in first and  
 845 last samples colored by infection dose (in PFU). **d** bacterial family abundances by infection dose  
 846 at the final sample collected. **E** diversity, weight and temperature z-scores (calculated from all  
 847 data points) over time per mouse as shown in a and Fig. 1. **F** untransformed diversity, weights  
 848 and temperatures relative to the beginning of the experiment.  
 849  
 850

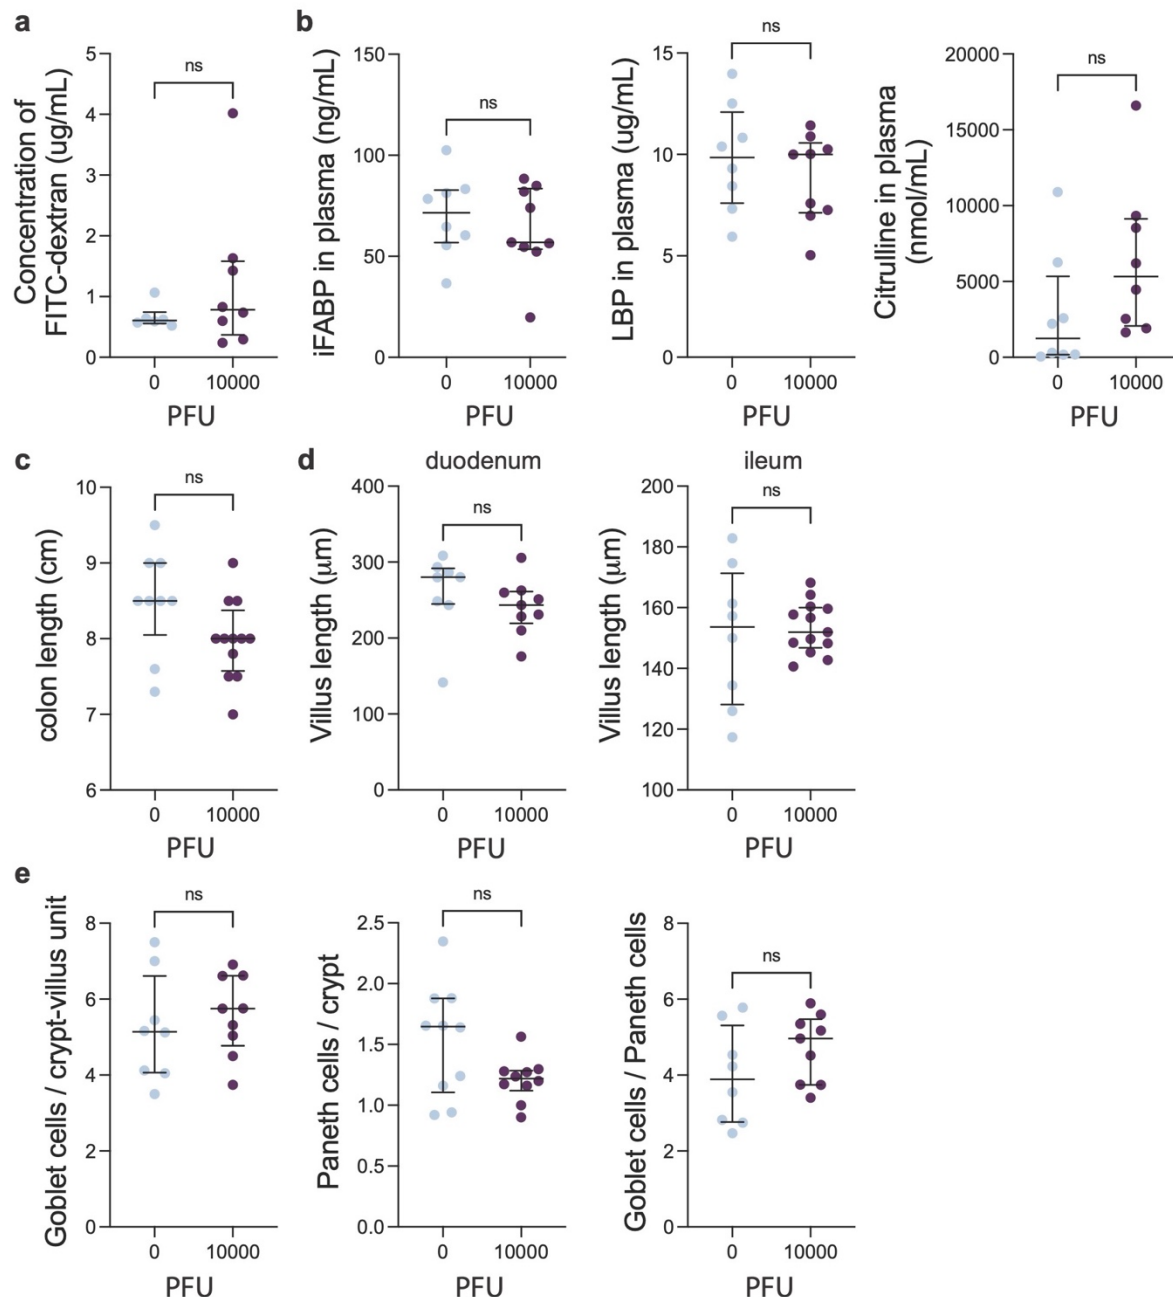

**Extended Data Fig. S3 Some intestinal parameters are not modified during SARS-CoV-2 infection.** K18-hACE2 mice were analyzed on day 5-6 post intranasal inoculation with 10000 PFU SARS-CoV-2 or mock treatment. **a.** Quantification of fluorescence intensity in the blood following oral administration of FITC-dextran. **B.** Intestinal fatty acid-binding protein (iFABP), LPS-binding protein (LBP), and citrulline concentration in plasma. **C.** Quantification of colon length. **d.** Quantification of villus length in the duodenum (left) and ileum (right) based on H&E staining. **E.**

859 Quantification of goblet cell number (left) and Paneth cell number (middle) per crypt-villus unit  
 860 in the proximal duodenum based on H&E staining and calculation of goblet cell per Paneth cell  
 861 ratio based on these quantifications (right). Individual mice, represented by the circles as well as  
 862 the median and interquartile ranges are depicted. In d, e, each circle shows the mean for each  
 863 mouse of the cell number counted per crypt-villus unit on 50 units. Results were pooled from 2  
 864 (for a) or 3 independent experiments with n=3-5 mice per group for each experiment. Significant  
 865 differences were determined using the Mann-Whitney U test (ns=non-significant,  $p > 0.05$ ; \*\*,  $p < 0.01$ ; \*\*\*,  $p < 0.001$ ; \*\*\*\*,  $p < 0.0001$ ).

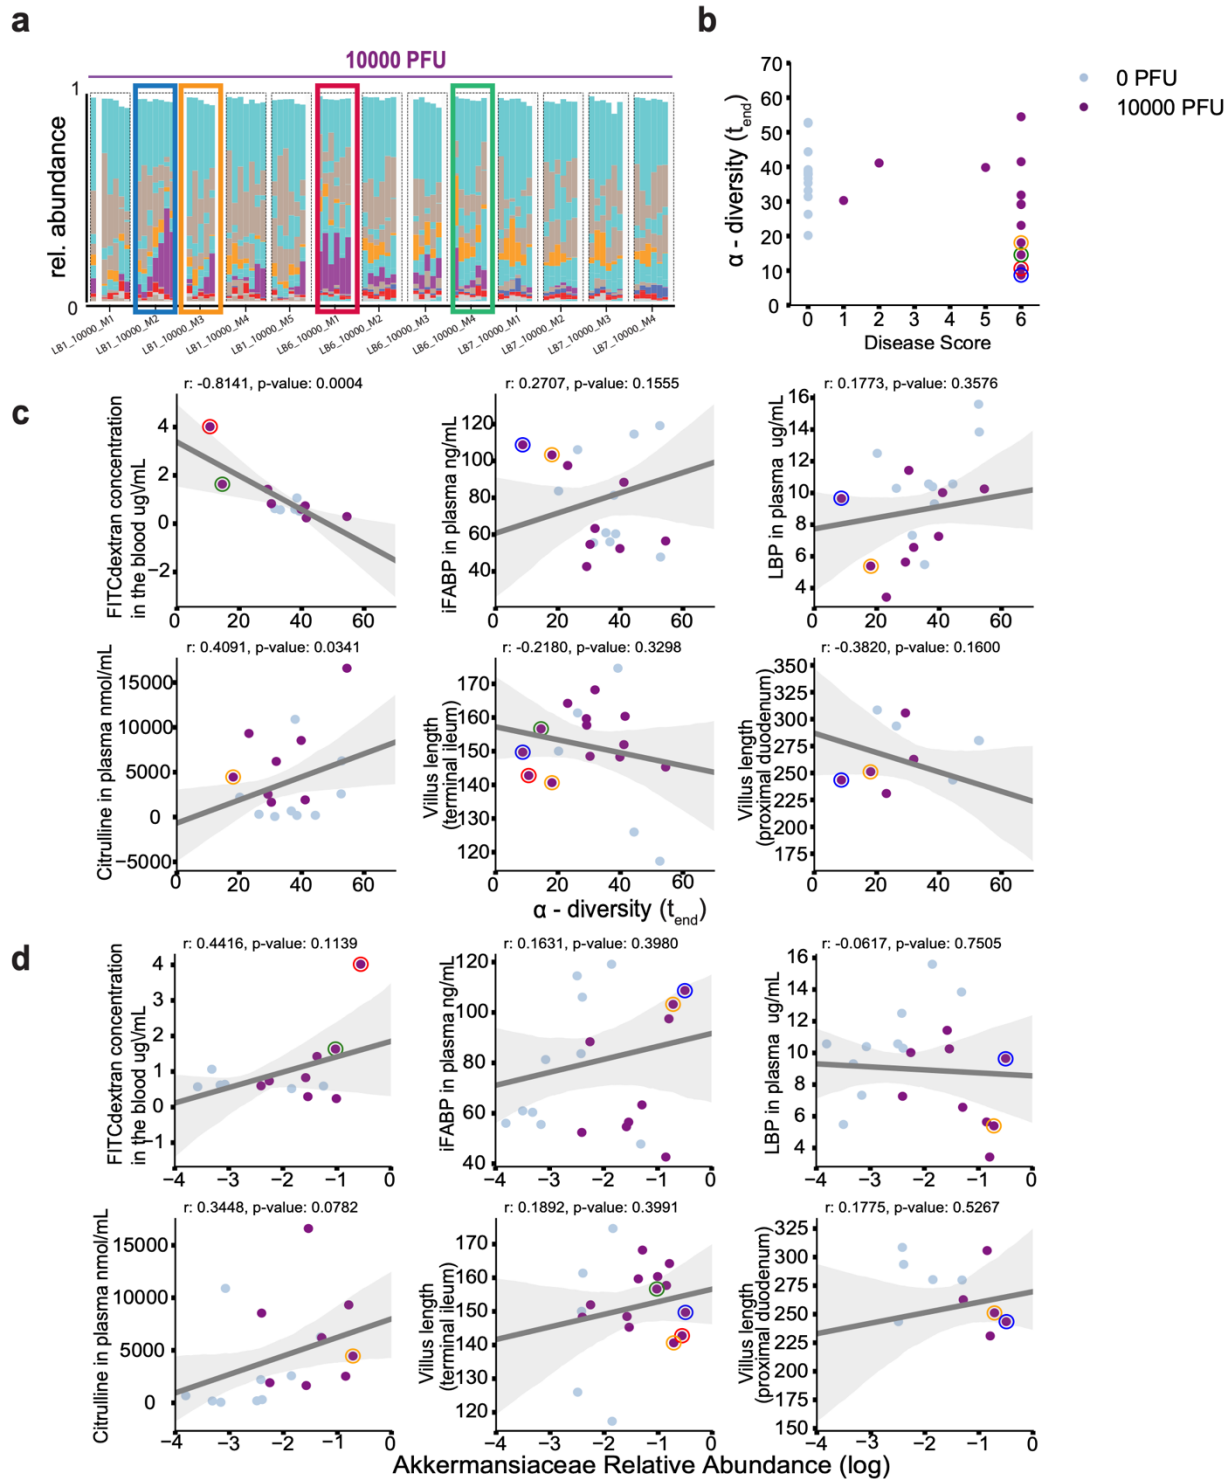

867  
868

869 **Extended Data Fig. S4 Strongest gut dysbiosis is correlated with markers of defects in the**  
870 **intestinal barrier and epithelium. A** Reproduction of Fig. 1 showing bacterial compositions in  
871 mice infected with  $10^4$  PFUs, highlighting four mice time courses of mice with lowest diversity

872 and highest disease scores at the end of the experiment (**b**). **c-d** Correlations between alpha  
873 diversity (**c**) (inverse Simpson) and  $\log_{10}$  relative *Akkermansia* abundances (**d**) at the end of the  
874 experiment with epithelium phenotypes and gut barrier integrity markers measured in the blood  
875 of mice (data from mice highlighted in **a** with circles in corresponding colors, lines: linear  
876 regression, shaded region: 95%CI).  
877  
878

879

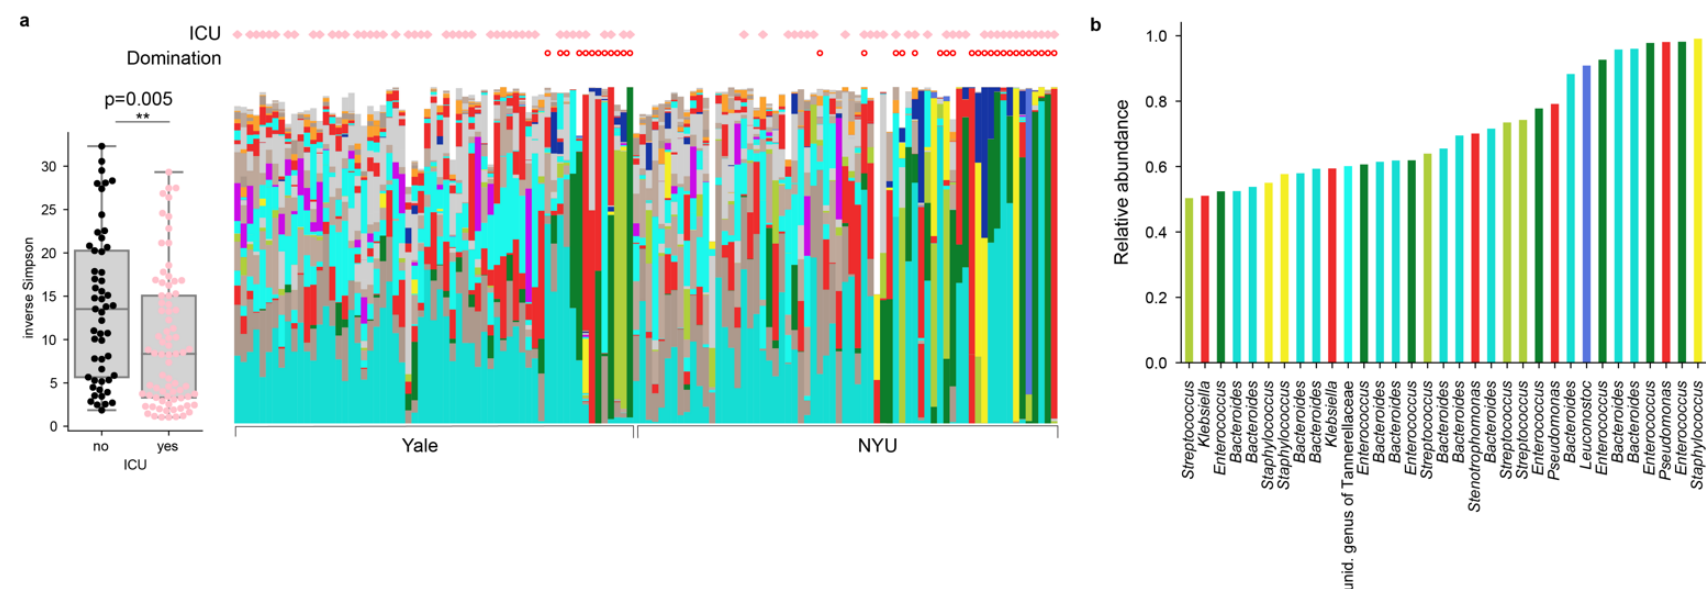

880

881 **Extended Data Fig. S5 a** Samples from patients requiring ICU transfer have lower diversity on average (p=0.005, Wilcoxon rank-

882 sum); bars as in Fig. 1 with ICU status of patients and domination state of samples indicated. **b** Genus abundances in samples with a

883 single genus >50% relative abundance.

884

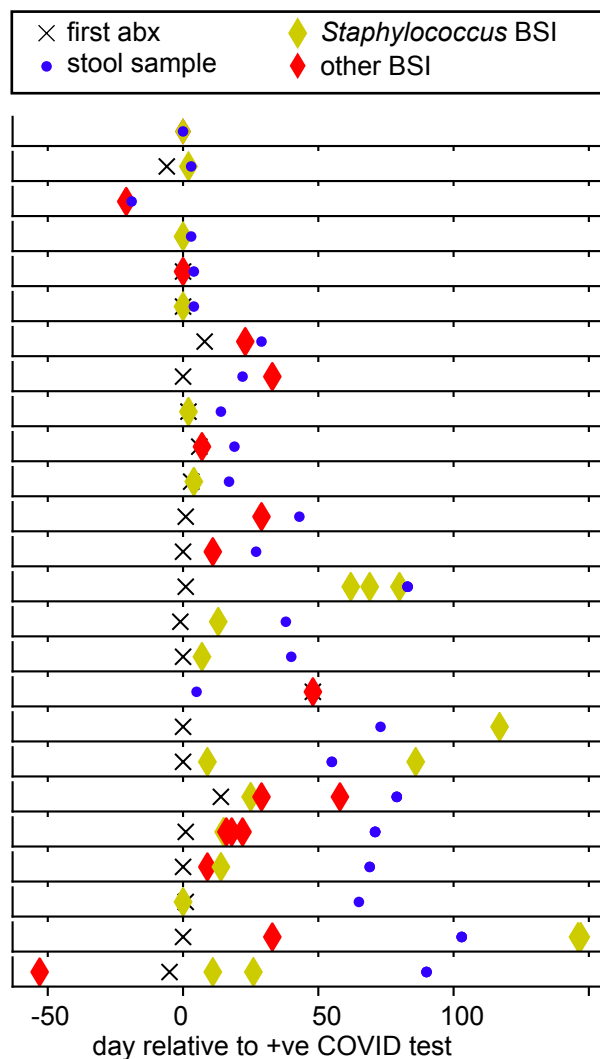

885

886 **Extended Data Fig. S6** Patients with a positive clinical blood culture result (BSI) received  
887 antibiotics, prior or on the day of blood culture results (cross symbol: first recorded antibiotic  
888 administration, blue: sequenced stool sample, diamond: positive blood culture result (BSI)).

889

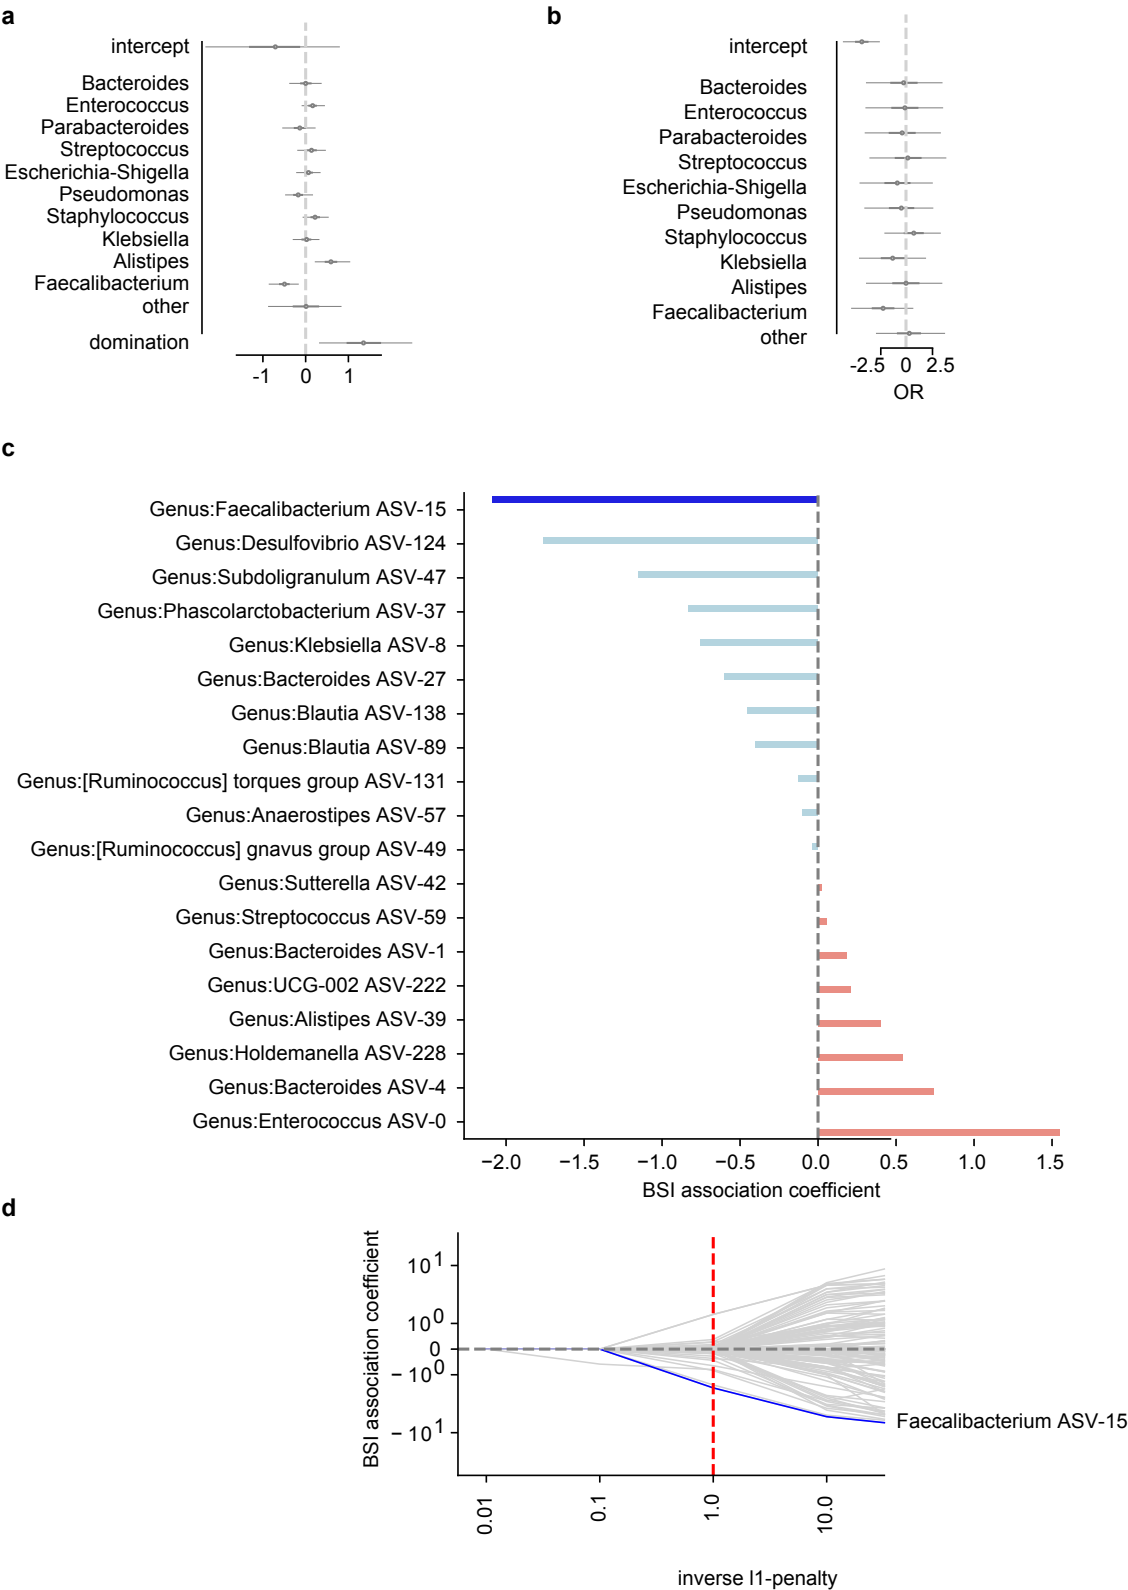

**Extended Data Fig. S7 a** Posterior coefficient estimates from a Bayesian logistic regression regressing  $\log_{10}$  relative abundances of the top 10 most abundant bacterial genera on BSI status

893 using only BSI cases with associated stool samples taken prior or on the day of a confirmed  
 894 positive blood culture. **b** Posterior coefficient estimates from a Bayesian logistic regression  
 895 regressing  $\log_{10}$  relative abundances of the top 10 most abundant bacterial genera on BSI status  
 896 with domination status of the microbiome as an additional predictor (domination: >50% of the  
 897 composition by one taxon). **c** ASVs associated with samples from patients with BSI. Coefficients  
 898 from a cross-validated, L1-penalized logistic regression correlating the binary outcome (BSI)  
 899 with  $\log_{10}$ -transformed relative ASV abundances. **d** Cross-validation paths; for all regularization  
 900 strengths (L1-penalty) used, a *Faecalibacterium* ASV was most negatively associated with BSI-  
 901 positive samples.

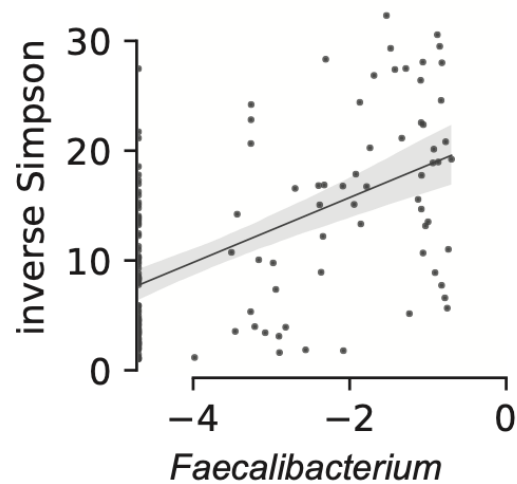

**Extended Data Fig. S8 *Faecalibacterium* relative abundance is positively correlated with bacterial alpha diversity.** Log10 transformed relative abundances of the genus *Faecalibacterium* in stool samples from patients are correlated with the inverse Simpson diversity index; line from linear regression, shaded region: 95%CI.



911 family compositions in stool samples; multiple samples belonging to the same patient grouped  
 912 by a white box. Two samples with matching whole genome sequenced (WGS) blood isolates  
 913 indicated. **b** Rank analysis of abundance patterns in stool samples from different BSI categories;  
 914 a filled circle indicates the calculated rank of the focal BSI category (row) in terms of the  
 915 corresponding taxon stool abundance relative to samples from other BSI categories (Lact:  
 916 Lactobacillales, Enbct: Enterobacterales; Pseu: Pseudomonadales, Bact: Bacteroidales, Staph:  
 917 Staphylococcales. Only 5 out of 7 BSI categories are shown because fungal BSIs and the  
 918 uninfected category have no corresponding bacterial stool abundances). **c,d** left: neighbor-joining  
 919 tree constructed from all NCBI RefSeq assemblies of *Staphylococcus aureus* genomes in  
 920 addition to isolates that were isolated from subjects highlighted in **a**. right: counts of perfect read  
 921 matches of shotgun metagenomic reads from stool samples, red: stool sample sequencing read  
 922 matches to WGS of isolates from the same patient, black: matches to other genomes.

**Supplementary Table 1: Clinical characteristics of patients with confirmed COVID-19 at NYU Langone Health and Yale New Haven Hospital**

|                                     | <b>NYU, N = 60</b> | <b>YALE, N = 36</b> |
|-------------------------------------|--------------------|---------------------|
| Age (years)                         | 51 ± 17.5          | 62.52 ± 19.72       |
| Sex (F   M)                         | 42%   58%          | 39%   61%           |
| <b>Hospital course and Outcomes</b> |                    |                     |
| ICU Admission                       | 53%                | 65%                 |
| Pneumonia                           | 42%                | 77%                 |
| Diarrhea                            | 13%                | 32%                 |
| Intubation                          | 36%                | 41%                 |
| Sepsis                              | 23%                | 18%                 |
| Encephalopathy                      | 12%                | 3%                  |
| Death                               | 5%                 | 21%                 |
| Length of stay (median, IQR)        | 37 (10-86)         | 27 (11-35.25)       |
| <b>Risk Factors</b>                 |                    |                     |
| Cancer within 1 year                | 7%                 | 4%                  |
| Chronic Heart Disease               | 18%                | 36%                 |
| Hypertension                        | 38%                | 64%                 |
| Chronic Lung Disease                | 7%                 | 20%                 |
| Immunosuppression                   | 17%                | 4%                  |

**Supplementary Table 2: Clinical characteristics of COVID-19 patients at NYU Langone Health and Yale New Haven Hospital with and without positive blood culture results (BSI).**

|                                     | <b>BSI, N = 26</b> | <b>non-BSI N = 53</b> |
|-------------------------------------|--------------------|-----------------------|
| <b>Hospital course and Outcomes</b> |                    |                       |
| ICU Admission                       | 69%                | 64%                   |
| Pneumonia                           | 73%                | 53%                   |
| Diarrhea                            | 31%                | 64%                   |
| Intubation                          | 58%                | 36%                   |
| Sepsis                              | 35%                | 21%                   |
| Encephalopathy                      | 19%                | 6%                    |
| Death                               | 15%                | 9%                    |
| Length of stay (median, IQR)        | 59 (23-91.5)       | 22 (6-51)             |

933 **Supplementary Table 3: Shotgun metagenomic reads mapped to species identified in clinical blood cultures.** Dark grey shading:  
 934 no sequencing reads from stool samples matched the species identified in clinical blood samples, light grey shading: species of the  
 935 same genus but not the same species had non-zero read counts in stool samples. The relative abundance of identified species were  
 936 contrasted with their mean abundances (log10 ratio).

937

| Organism identified in blood                           | species identified in stool sample             | Log ratio |
|--------------------------------------------------------|------------------------------------------------|-----------|
| <i>Bacteroides thetaiotaomicron</i>                    | Bacteroides_thetaiotaomicron_14-106904-2       | 2.92      |
| <i>Enterococcus faecalis</i> Group D                   | Enterococcus_faecalis_LD33                     | 1.8       |
| <i>Escherichia coli</i>                                | Escherichia_coli_K-12_substr._W3110            | 2.2       |
| <i>Escherichia coli</i>                                | Escherichia_coli_IAI39                         | 1.6       |
| <i>Escherichia coli</i>                                | Escherichia_coli_536                           | 2.8       |
| <i>Klebsiella pneumoniae</i>                           | Klebsiella_pneumoniae_KPNIH27                  | -1.7      |
| <i>Lactobacillus species</i>                           | Lactobacillus_curvatus_WiKim38                 | 3.9       |
| <i>Pseudomonas aeruginosa</i>                          | Pseudomonas_aeruginosa_SJTD-1                  | 3.3       |
| <i>Serratia marcescens</i>                             | Serratia_marcescens_CAV1492                    | -0.2      |
| <i>Staphylococcus aureus</i>                           | Staphylococcus_aureus_RF122                    | 1.9       |
| <i>Proteus mirabilis</i>                               | Proteus_mirabilis;t_Proteus_mirabilis_BB2000   | 0.56      |
| <i>Acinetobacter lwolfii</i>                           | Acinetobacter_calcoaceticus_EGD_AQ_BF14        | -0.6      |
| <i>Staphylococcus</i>                                  | Staphylococcus_sp._HMSC063G01_HMSC063G01       | 0.9       |
| <i>Staphylococcus</i>                                  | Staphylococcus_epidermidis_W23144              | 3.3       |
| <i>Staphylococcus aureus</i>                           | not found                                      |           |
| <i>Staphylococcus hominis</i>                          | not found                                      |           |
| <i>Staphylococcus capitis</i>                          | not found                                      |           |
| <i>Staphylococcus epidermidis, hominis</i>             | Staphylococcus_pseudintermedius_063228         | 2.2       |
| <i>Staphylococcus epidermidis, hominis ssp hominis</i> | not found                                      |           |
| <i>Staphylococcus epidermidis</i>                      | Staphylococcus_aureus_JKD6008                  | 2.7       |
| <i>Staphylococcus epidermidis</i>                      | Staphylococcus_epidermidis_DAR1907             | 1.1       |
| <i>Staphylococcus capitis</i>                          | Staphylococcus_sp._HMSC067F07_HMSC067F07       | 3.7       |
| <i>Staphylococcus epidermidis, hominis ssp hominis</i> | Staphylococcus_hominis_793_SHAE                | 0.8       |
| <i>Staphylococcus epidermidis</i>                      | Staphylococcus_sp._HMSC070D05_HMSC070D05       | 3.8       |
| <i>Staphylococcus hominis, epidermidis</i>             | Staphylococcus_hominis_MMP2                    | 1.0       |
| <i>Staphylococcus hominis, epidermidis</i>             | Staphylococcus_epidermidis_ATCC12228_GCF7645.1 | 0.2       |

938

939 **Supplementary Table 4:** SRA accession numbers for the bioproject PRJNA745367

940 corresponding to the mouse sequencing data.

941 (Excel sheet)

942

943 **Supplementary Table 5:** SRA accession numbers for the bioproject PRJNA746322

944 corresponding to the human stool samples sequencing data.

945 (Excel sheet)

946
